# Supplementary material for: miR-96 attenuates status epilepticus-induced brain injury by directly targeting Atg7 and Atg16L1
Source: PubMed Central journal article supplement (PMC5579030; doi:10.1038/s41598-017-10619-0), 2017-08-31

# **miR-96 attenuates status epilepticus-induced brain injury by directly targeting Atg7 and Atg16L1**

Jing Gan<sup>1,2</sup>, Qianyun Cai<sup>1,2</sup>, Yi Qu<sup>1,2</sup>, Fengyan Zhao<sup>1,2</sup>, Rong Luo<sup>1,2</sup>, Chaomin Wan<sup>1,2</sup>,  
Dezhi Mu<sup>1,2,3\*</sup>

<sup>1</sup>Department of Pediatrics, West China Second University Hospital, Sichuan University, Chengdu 610041, China

<sup>2</sup>Key Laboratory of Obstetric & Gynecologic and Pediatric Diseases and Birth Defects of Ministry of Education, Sichuan University, Chengdu 610041, China

<sup>3</sup>Department of Pediatrics, University of California, San Francisco, CA94143, USA

Corresponding author: Dezhi Mu MD, PhD

Department of Pediatrics, West China Second University Hospital, Sichuan University  
Chengdu, Sichuan 610041, P. R. China

Email: mudz@scu.edu.cn

Tel: +86-28-85559065

## **Figure 1**

The sample order: Ctrl, SE-2, 6, 12, 24, 48, 72, 144h  
LC3

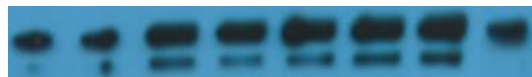

Beclin-1

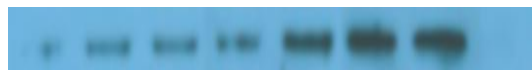

P62

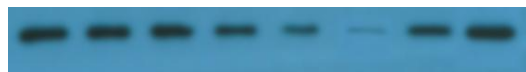

$\beta$ -actin

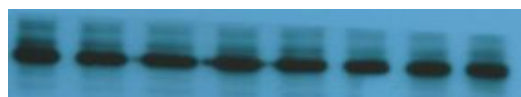

**Figure 2**

The sample order: Ctrl, SE-2, 6, 12, 24, 48, 72, 144h  
Atg7

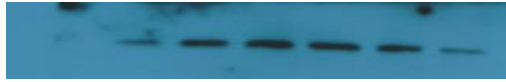

$\beta$ -actin

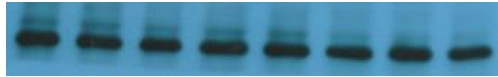

**Figure 3**

The sample order: Ctrl, SE-2, 6, 12, 24, 48, 72, 144h  
Atg16 L1

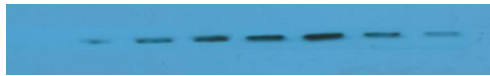

$\beta$ -actin

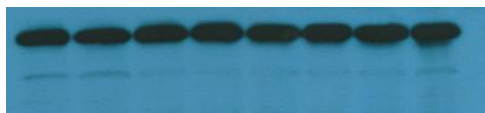

**Figure 6**

The sample order: Ctrl, SE, SE-miR-NC, SE-miR-96  
Atg7

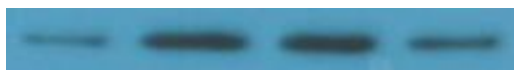

Atg16L1

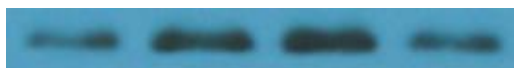

$\beta$ -actin

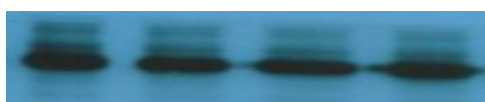

**Figure 7**

The sample order: Ctrl, SE, SE-miR-NC, SE-miR-96  
LC3

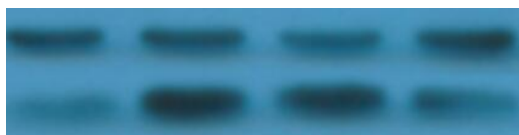

P62

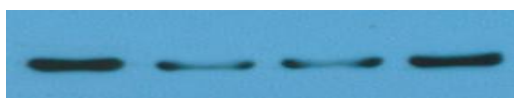

$\beta$ -actin

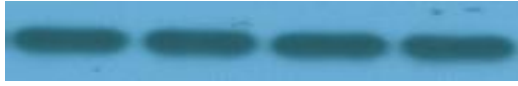

**Figure 8**

The sample order: SE-miR-NC, SE-miR-96, SE-Rap-miR-NC, SE-Rap-miR-96

LC3

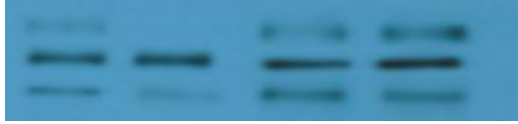

P62

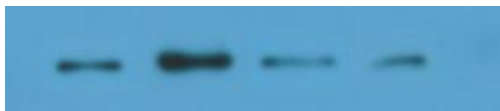

$\beta$ -actin

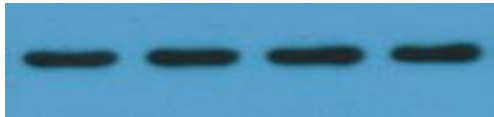

Supplement: 41598_2017_10619_MOESM1_ESM.pdf [file 41598_2017_10619_MOESM1_ESM.pdf]
